# Supplementary material for: Intestinal toxicity alleviation and efficacy potentiation through therapeutic administration of Lactobacillus paracasei GY-1 in the treatment of gout flares with colchicine
Source: Royal Society of Chemistry journal article supplement (doi:10.1039/d3fo04858f), 2024-01-01
Supplement: d3fo04858f1.pdf [file d3fo04858f1.pdf]

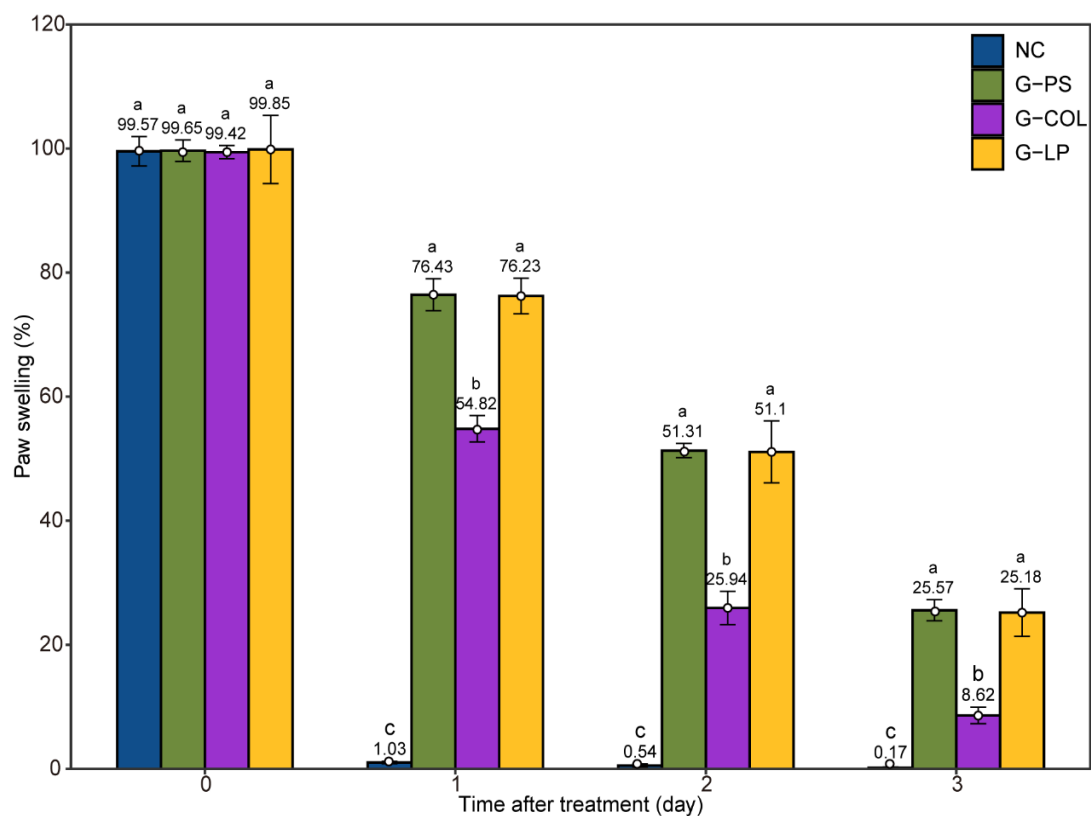

**Supplementary Figure 1. Paw swelling at different time points after treatment.** NC, normal control; G-PS, gout treated with physiological saline; G-COL; gout treated with COL; G-LP, gout treated with *Lactobacillus paracasei* GY-1. Different low-case letters indicate statistical difference at  $P < 0.05$ , one-way ANOVA followed by Tukey's post hoc test ( $n = 6$  in each group).

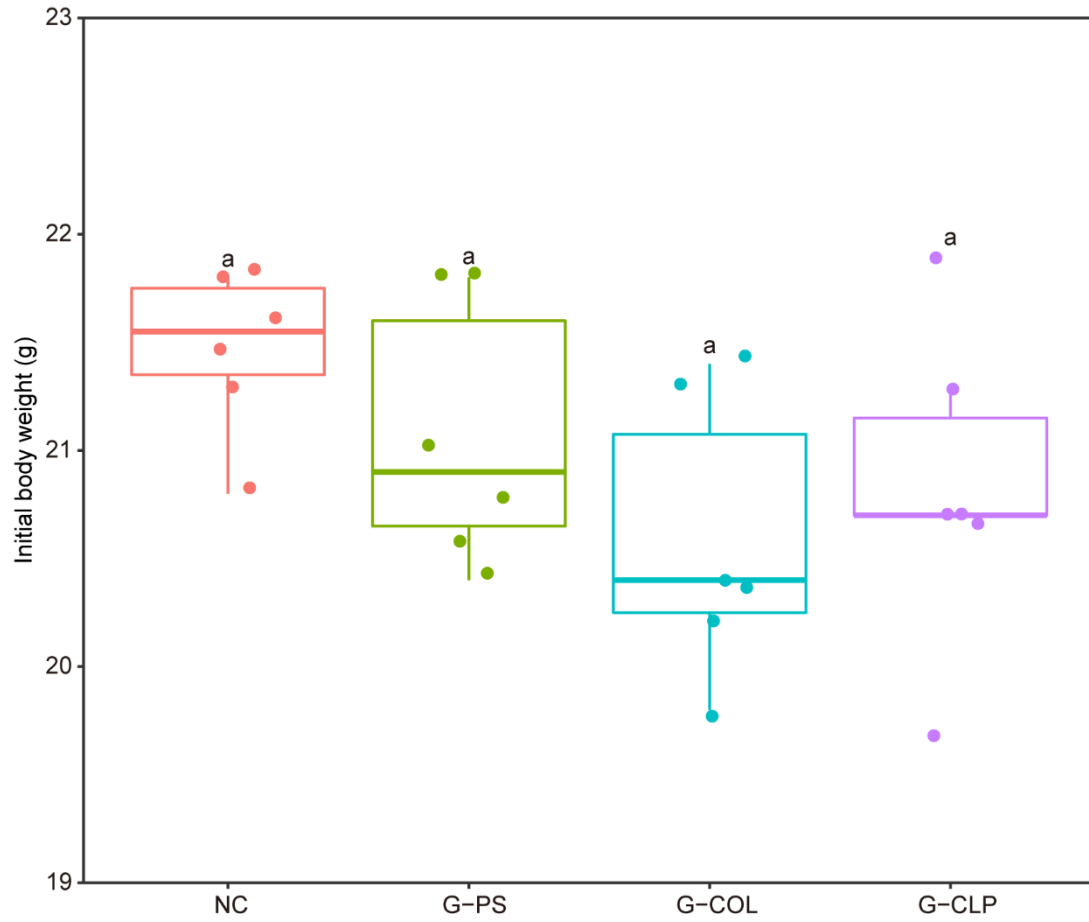

**Supplementary Figure 2. Initial body weights for all the mice in the four groups.** Different low-case letters indicate statistical difference at  $P < 0.05$ , one-way ANOVA followed by Tukey's post hoc test ( $n = 6$  in each group).

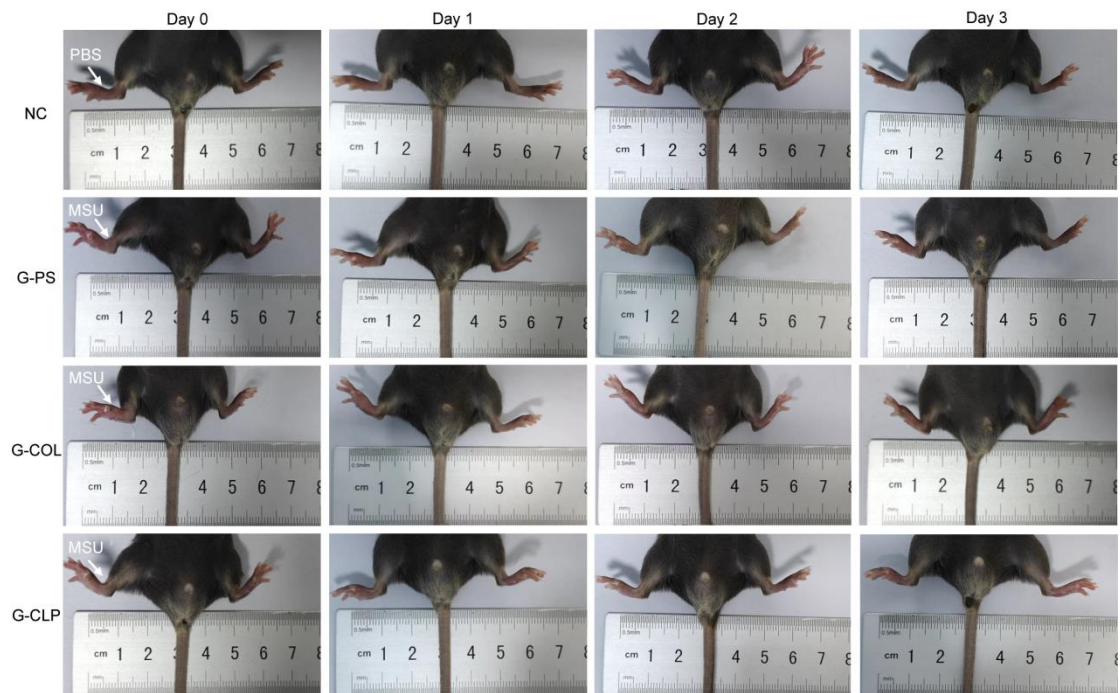

**Supplementary Figure 3. Representative picture of paw swelling.** Either MSU crystals or PBS was injected into the right hind paw on day 0.

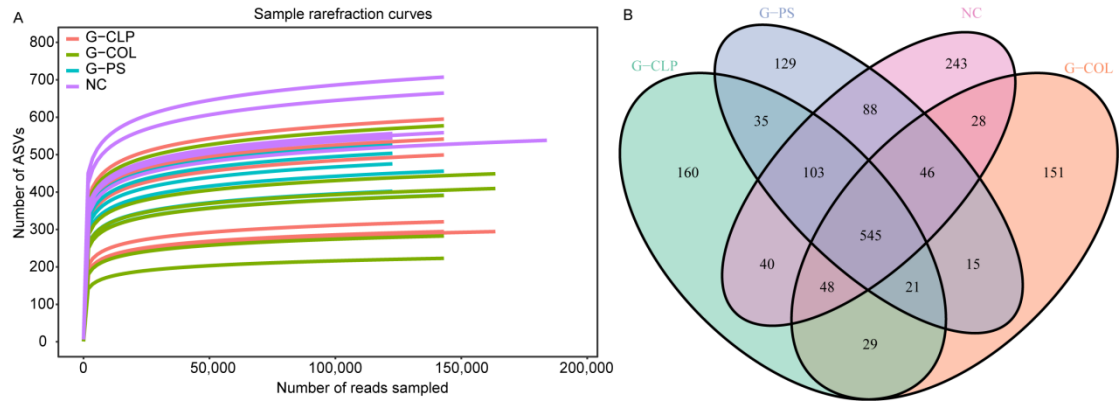

**Supplementary Figure 4. Sample rarefaction curves and Venn diagram for amplicon sequence variants (ASVs).** A, Rarefaction curves for all samples. B, Venn diagram illustrating the unique and shared ASVs.

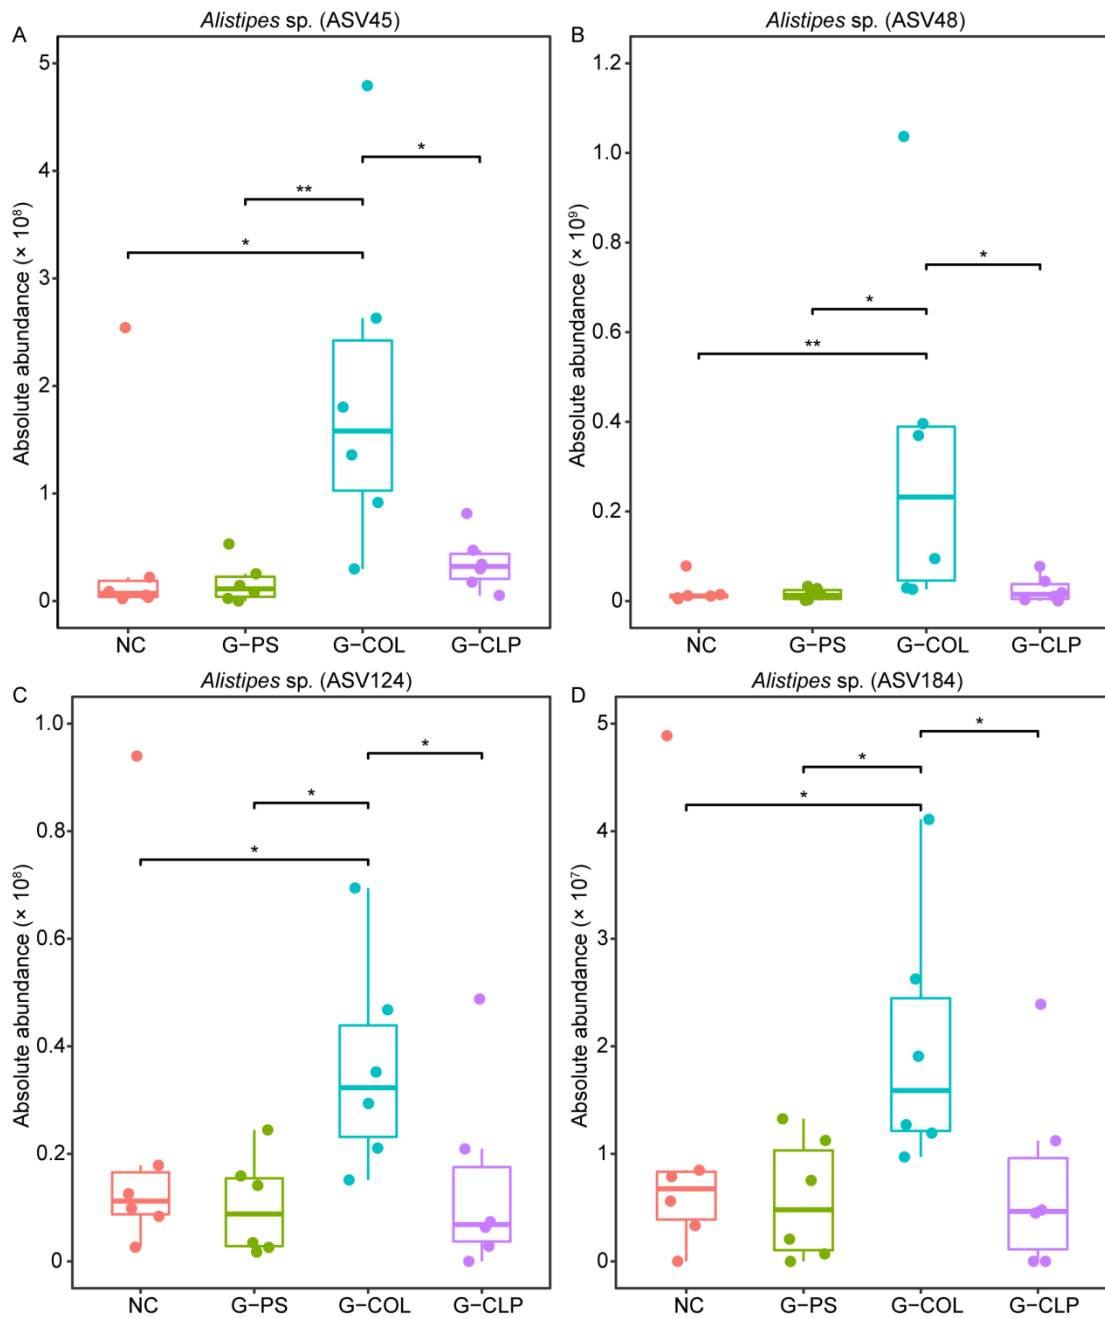

**Supplementary Figure 5. Four *Alistipes* species responsible for toxicity mitigation.**

A, the absolute abundance of *Alistipes* sp. (ASV45); B, the absolute abundance of *Alistipes* sp. (ASV48); C, the absolute abundance of *Alistipes* sp. (ASV124); D, the absolute abundance of *Alistipes* sp. (ASV184). \* $P < 0.05$ , and \*\* $P < 0.01$ , Wilcoxon rank sum test with continuity correction compared to the G-COL group.

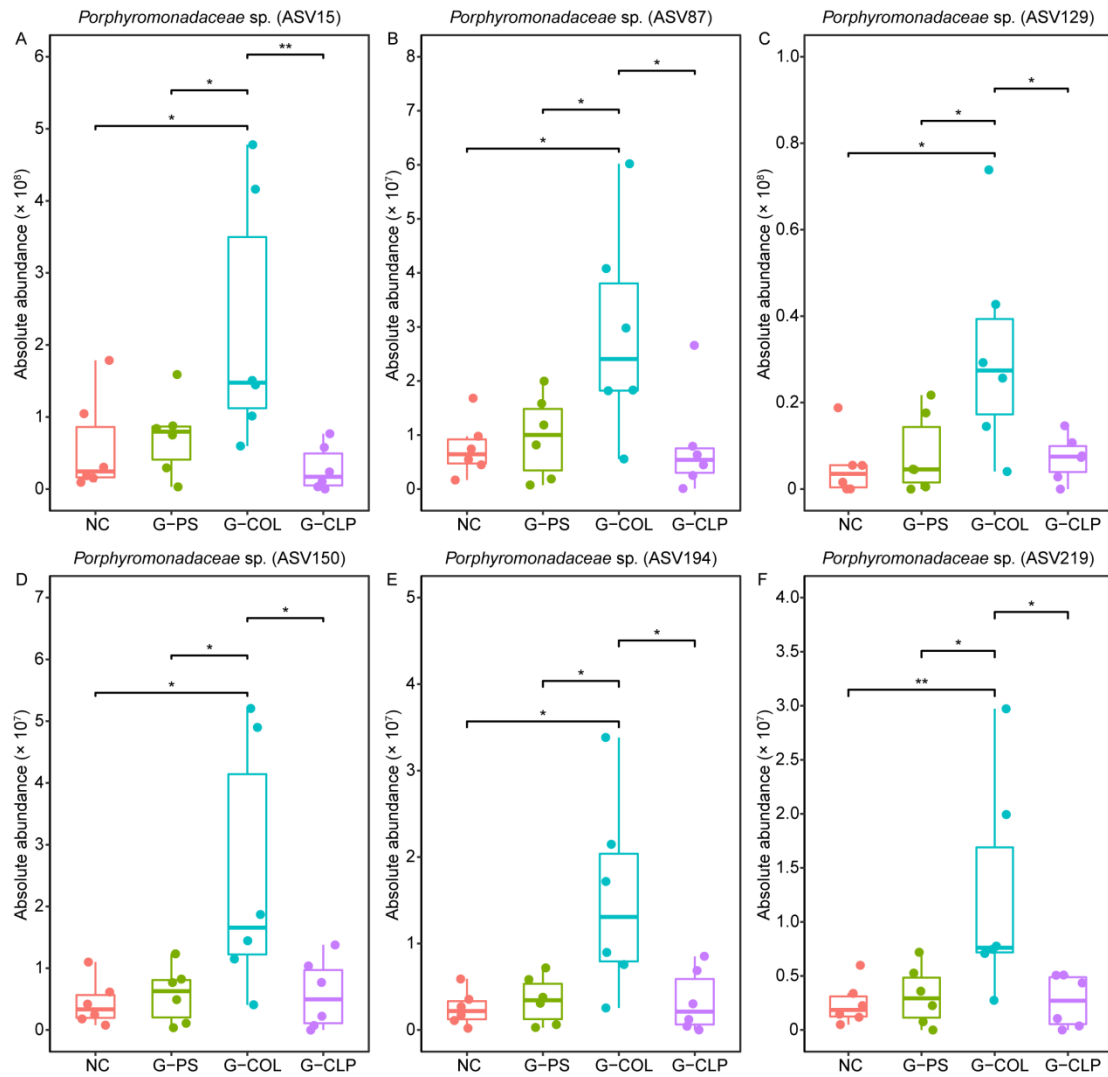

**Supplementary Figure 6. Six *Porphyromonadaceae* species responsible for toxicity mitigation.** A, the absolute abundance of *Porphyromonadaceae* sp. (ASV15); B, the absolute abundance of *Porphyromonadaceae* sp. (ASV87); C, the absolute abundance of *Porphyromonadaceae* sp. (ASV129); D, the absolute abundance of *Porphyromonadaceae* sp. (ASV150); E, the absolute abundance of *Porphyromonadaceae* sp. (ASV194); F, the absolute abundance of *Porphyromonadaceae* sp. (ASV219). \* $P < 0.05$ , and \*\* $P < 0.01$ , Wilcoxon rank sum test with continuity correction compared to the G-COL group.

**Table S1. Primer list for quantitative Real-Time PCR amplification.**

| <b>Gene</b> | <b>Forward primer</b>          | <b>Reverse primer</b>         |
|-------------|--------------------------------|-------------------------------|
| GAPDH       | 5'-GCATCCACTGGTGCTGCC-3'       | 5'-TCATCATACTTGGCAGGTTTC-3'   |
| Occludin    | 5'-ATGTCCGGCCGATGCTCTC-3'      | 5'-TTTGGCTGCTCTTGGGTCTGTAT-3' |
| Claudin-1   | 5'-GTTTGCAGAGACCCCATCAC-3'     | 5'-AGAAGCCAGGATGAAACCCA-3'    |
| Zo-1        | 5'-ACCCGAAACTGATGCTGTGGATAG-3' | 5'-AAATGGCCGGCAGAACTTGTGTA-3' |

**Table S2. The reads were obtained per sample**

| <b>Sample ID</b> | <b># Raw reads</b> | <b># Remained reads</b> | <b>% of remained reads</b> | <b>Group</b> |
|------------------|--------------------|-------------------------|----------------------------|--------------|
| J1-1             | 224,813            | 203,120                 | 90.35                      | G-CLP        |
| J2-1             | 227,826            | 207,942                 | 91.27                      | G-CLP        |
| J3-1             | 224,058            | 197,636                 | 88.21                      | G-CLP        |
| J4-1             | 232,350            | 205,305                 | 88.36                      | G-CLP        |
| J5-1             | 227,570            | 204,106                 | 89.69                      | G-CLP        |
| J6-1             | 230,034            | 203,472                 | 88.45                      | G-CLP        |
| M1-1             | 216,653            | 192,173                 | 88.7                       | G-PS         |
| M2-1             | 218,073            | 193,578                 | 88.77                      | G-PS         |
| M3-1             | 230,479            | 206,889                 | 89.76                      | G-PS         |
| M4-1             | 226,853            | 202,059                 | 89.07                      | G-PS         |
| M5-1             | 230,802            | 205,001                 | 88.82                      | G-PS         |
| M6-1             | 221,574            | 193,938                 | 87.53                      | G-PS         |
| Q1-1             | 232,439            | 209,563                 | 90.16                      | G-COL        |
| Q2-1             | 221,379            | 199,418                 | 90.08                      | G-COL        |
| Q3-1             | 231,025            | 204,041                 | 88.32                      | G-COL        |
| Q4-1             | 221,766            | 196,262                 | 88.5                       | G-COL        |
| Q5-1             | 227,525            | 204,221                 | 89.76                      | G-COL        |
| Q6-1             | 218,671            | 193,030                 | 88.27                      | NC           |
| Z1-1             | 227,561            | 202,959                 | 89.19                      | NC           |
| Z2-1             | 232,893            | 207,797                 | 89.22                      | NC           |
| Z3-1             | 222,642            | 199,703                 | 89.7                       | NC           |
| Z4-1             | 224,028            | 198,469                 | 88.59                      | NC           |
| Z5-1             | 228,549            | 204,989                 | 89.69                      | NC           |
| Z6-1             | 228,110            | 202,891                 | 88.94                      | NC           |
